# Supplementary material for: Polysaccharides From the Roots of Millettia Speciosa Champ Modulate Gut Health and Ameliorate Cyclophosphamide-Induced Intestinal Injury and Immunosuppression
Source: PubMed Central journal article supplement (PMC8567740; doi:10.3389/fimmu.2021.766296), 2021-10-21
Supplement: DataSheet_1.pdf [file DataSheet_1.pdf]

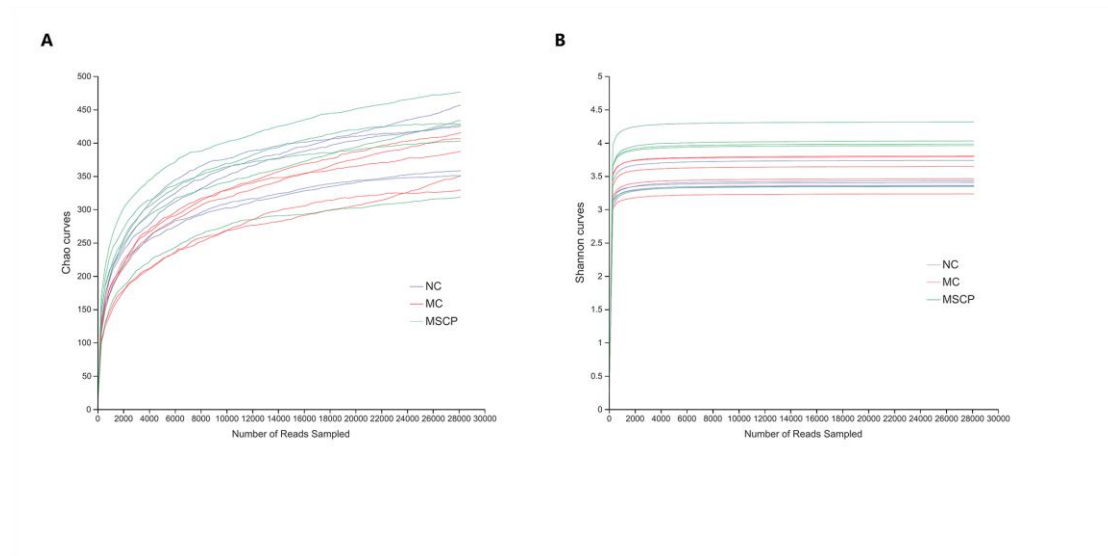

**Supplementary Figure 1.** Alpha diversity indexes of microbiota in different groups. **(A)** Chao diversity index. **(B)** Shannon diversity index.
