# Supplementary material for: Polysaccharides From the Roots of Millettia Speciosa Champ Modulate Gut Health and Ameliorate Cyclophosphamide-Induced Intestinal Injury and Immunosuppression
Source: PubMed Central journal article supplement (PMC8567740; doi:10.3389/fimmu.2021.766296), 2021-10-21
Supplement: Table_1.pdf [file Table_1.pdf]

**Supplementary Table S1. Primer sequences of mRNA for qRT-PCR.**

| Genes          | Primer sequence (5'-3')    |
|----------------|----------------------------|
| $\beta$ -actin | F: GTGCTATGTTGCTCTAGACTTCG |
|                | R: ATGCCACAGGATTCCATACC    |
| TLR2           | F: ACCCGCCCTTTAAGCTGTGT    |
|                | R: TCGTACTTGCACCACTCGCT    |
| TLR4           | F: TCTGGGGAGGCACATCTTCT    |
|                | R: AGGTCCAAGTTGCCGTTTCT    |
| MyD88          | F: TCATGTTCTCCATACCCTTGGT  |
|                | R: AAAGTGCAGTGGGGTCAG      |
| p65            | F: GCCTCTGGCGAATGGCTTTA    |
|                | R: TGCTTCGGCTGTTGATGAT     |
| Occludin1      | F: GCCCCTCTTTCCTTAGGCG     |
|                | R: AAGATAAGCGAACCTGCCGA    |
| Claudin1       | F: TCTACGAGGGACTGTGGATG    |
|                | R: TCAGATTCAGCTAGGAGTCG    |
| MUC-2          | F: CCCAGAAGGGACTGTGTATG    |
|                | R: TGCAGACACACTGCTCACA     |
